# Supplementary material
Source: PubMed Central journal article supplement (PMC7082848)
Supplement: NIHMS1551411-supplement-Supplementary_Information.pdf [file NIHMS1551411-supplement-Supplementary_Information.pdf]

**Supplementary Information** for the manuscript:

“Evaluation of Fluid Resuscitation Control Algorithms via a Hardware-in-the-Loop Test Bed”

**Authors:** Hossein Mirinejad, Margo Ricks, Bahram Parvinian, Yi Zhang, Sandy Weininger, Jin-Oh-Hahn, and Christopher G. Scully

- **Blood Pressure (BP) Waveform Generator**

The BP waveform is generated (Box B in Fig. 1) by adjusting a template BP pulse from a single cardiac cycle. The template pulse is normalized to 1000 samples length and 0 to 1 height. The pulse pressure (PP), diastolic pressure ( $P_{Dias}$ ), and pulse-pulse interval (PP-Int) can then be set for each beat to scale the pulse to the current values. However, for this work, PP was fixed at 40 mmHg and  $P_{Dias}$  was initially set as the first MAP value output from the computational patient model minus one-third PP. MAP of the waveform was set by adjusting the offset of the waveform by the current value output from the computational patient model.  $P_{Dias}$  was then set as the previous value. To prevent step changes in the pressure waveform, differences between the previous and current value of  $P_{Dias}$  were linearly distributed over the tail of the pressure pulse [ $Pulse(n) = Pulse(n) + ((P_{Dias}(M) - P_{Dias}(M-1))/400) \times Pulse(n)$ , where n are the pulse shape samples from 601 to 1000 and M is the current pulse]. PP-Int was set from the current heart rate value and the pulse was linearly interpolated to match the length of the current interval.

- **Individual RMSE values for all three comparisons (i.e., HIL vs. in silico, HIL vs. in vivo, and in silico vs. in vivo)**

**Table 1** Root mean square of error (RMSE) for hemodynamic measurements between the HIL system and in vivo data for individual subjects

| Subject              | BV (L)          | CO (L/min)       | MAP (mmHg)      |
|----------------------|-----------------|------------------|-----------------|
| 1                    | 0.07            | 0.46             | 9.05            |
| 2                    | 0.09            | 1.41             | 16.95           |
| 3                    | 0.06            | 0.85             | 6.68            |
| 4                    | 0.06            | 0.48             | 5.52            |
| 5                    | 0.05            | 0.47             | 6.78            |
| 6                    | 0.09            | 0.39             | 6.02            |
| 7                    | 0.07            | 0.48             | 9.61            |
| 8                    | 0.15            | 0.56             | 9.74            |
| 9                    | 0.11            | 0.44             | 9.31            |
| <b>Mean (SD)</b>     | 0.08 (0.03)     | 0.62 (0.33)      | 8.85 (3.45)     |
| <b>Mean % (SD %)</b> | 4.29 % (2.08 %) | 16.17 % (6.76 %) | 11.57 % (3.69%) |

**Table 2** Root mean square of error (RMSE) for hemodynamic measurements between the HIL system and in silico data for individual subjects

| Subject              | BV (L)          | CO (L/min)     | MAP (mmHg)     |
|----------------------|-----------------|----------------|----------------|
| 1                    | 0.03            | 0.25           | 3.57           |
| 2                    | 0.06            | 1.04           | 12.63          |
| 3                    | 0.01            | 0.13           | 1.47           |
| 4                    | 0.01            | 0.03           | 0.12           |
| 5                    | 0.03            | 0.11           | 0.57           |
| 6                    | 0.03            | 0.11           | 0.97           |
| 7                    | 0.01            | 0.39           | 4.33           |
| 8                    | 0.06            | 0.31           | 4.56           |
| 9                    | 0.05            | 0.21           | 1.20           |
| <b>Mean (SD)</b>     | 0.03 (0.02)     | 0.28 (0.30)    | 3.27 (3.88)    |
| <b>Mean % (SD %)</b> | 1.72 % (1.34 %) | 7.36 % (7.1 %) | 4.12 % (4.64%) |

Table 3 Root mean square of error (RMSE) for hemodynamic measurements between in silico and in vivo data for individual subjects

| Subject       | BV (L)          | CO (L/min)       | MAP (mmHg)     |
|---------------|-----------------|------------------|----------------|
| 1             | 0.05            | 0.45             | 8.72           |
| 2             | 0.07            | 0.81             | 10.42          |
| 3             | 0.06            | 0.85             | 6.64           |
| 4             | 0.06            | 0.47             | 5.48           |
| 5             | 0.05            | 0.41             | 6.65           |
| 6             | 0.08            | 0.42             | 5.90           |
| 7             | 0.07            | 0.51             | 7.02           |
| 8             | 0.10            | 0.43             | 7.57           |
| 9             | 0.08            | 0.29             | 8.54           |
| Mean (SD)     | 0.07 (0.02)     | 0.52 (0.19)      | 7.44 (1.56)    |
| Mean % (SD %) | 3.50 % (1.21 %) | 13.51 % (3.22 %) | 9.82 % (1.47%) |

- Total amount of fluid infusion from PID and rule-based controller for each subject

Table 4 Total amount of fluid infused by the controllers for individual subjects

|           | PID (mL) | Rule-Based (mL) |
|-----------|----------|-----------------|
| Subject 1 | 687      | 403             |
| Subject 2 | 384      | 260             |
| Subject 3 | 1581     | 1103            |
| Subject 4 | 1484     | 695             |
| Subject 5 | 1177     | 842             |
| Subject 6 | 1410     | 846             |
| Subject 7 | 1423     | 892             |
| Subject 8 | 889      | 378             |
| Subject 9 | 399      | 261             |

- 

- Six different blood pressure artifact models added to the waveform

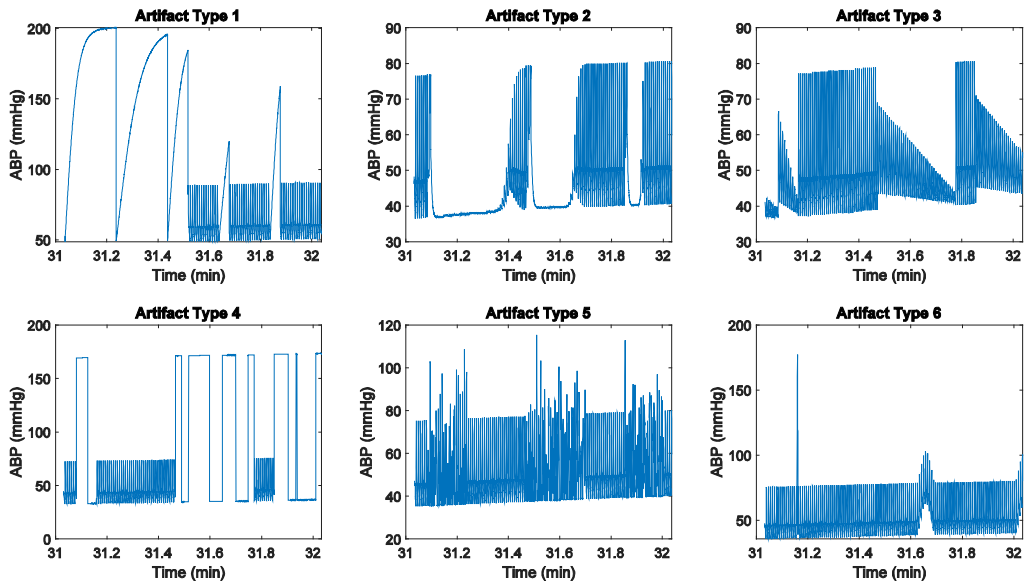

Figure 1 Arterial blood pressure combined with separate artifacts: Type 1: rapid saturation to some maximal BP (ExpBPmax), Type 2: rapid saturation to some BP minimum (ExpBPmin), Type 3: rapid saturation to the current mean BP (LinearAtt), Type 4: high amplitude square wave artifact (Square), Type 5: high frequency noise (HighFreq) and Type 6: highly transient impulse-like artifact (Sinc).

- Infusion and MAP responses for all experiments (in presence of different types of BP artifacts)

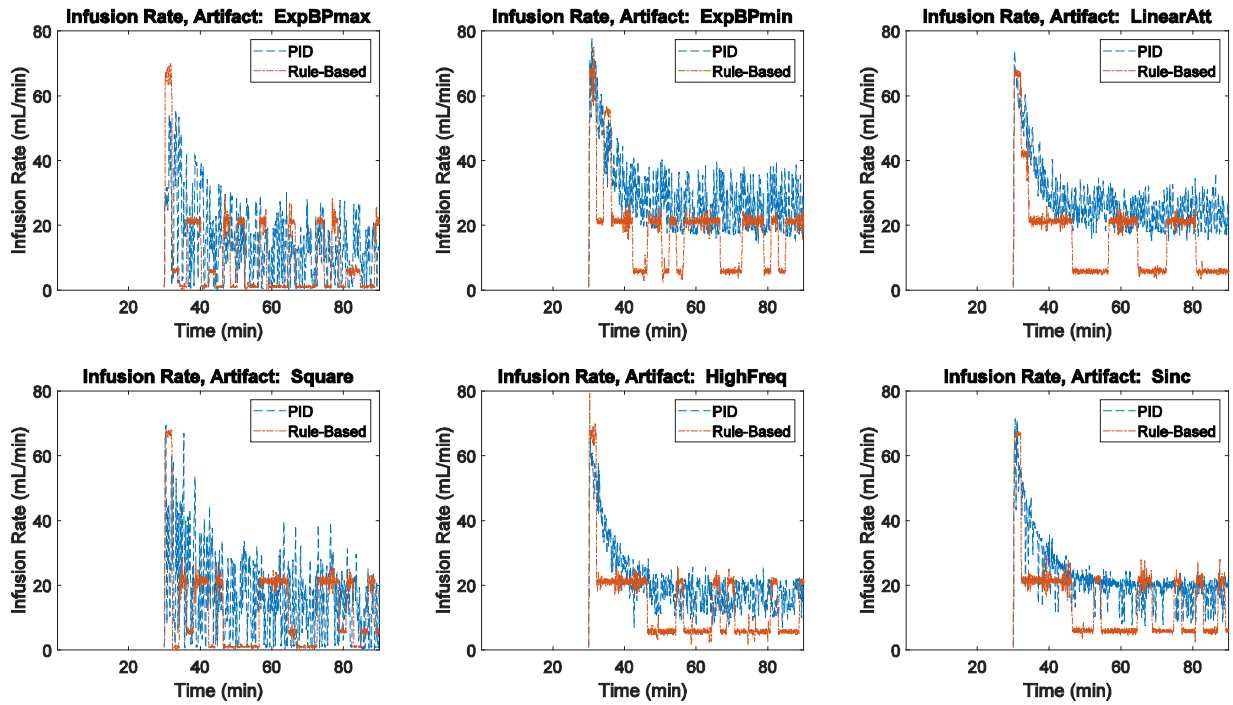

Figure 2 Infusion rate of controllers for different types of BP artifacts: ExpBPmax, ExpBPmin, LinearAtt, Square, HighFreq, and Sinc

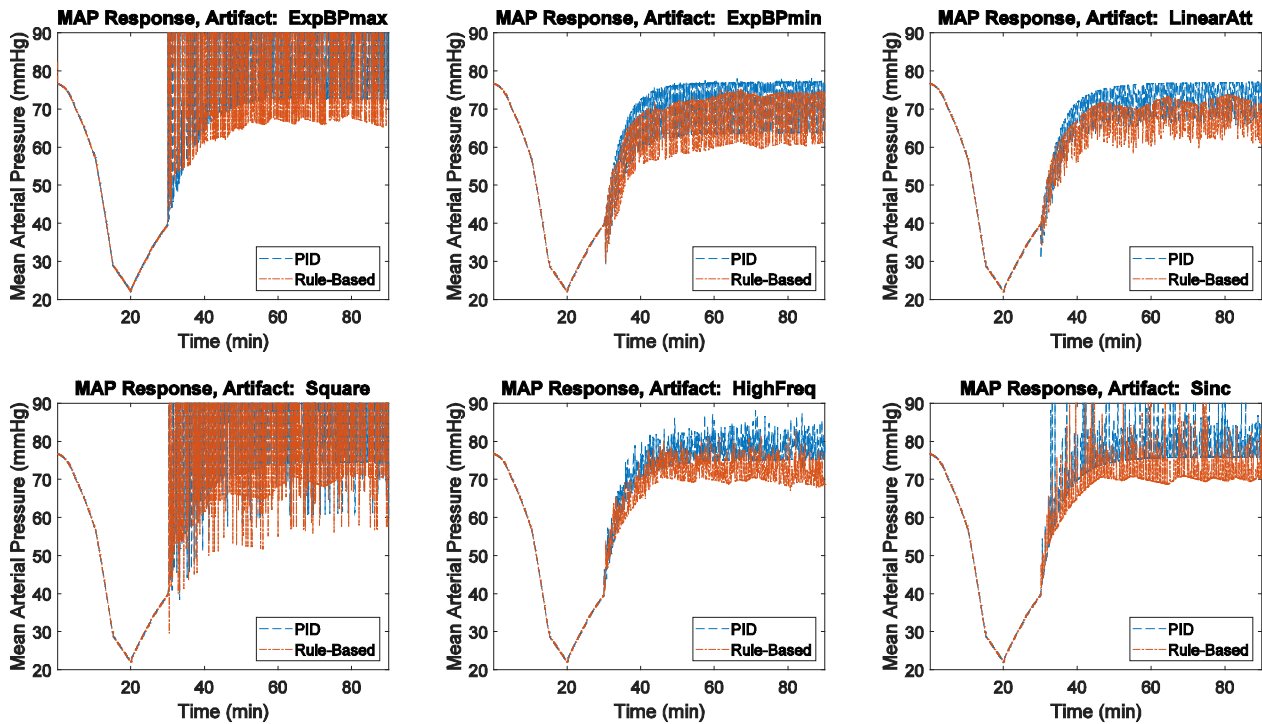

Figure 3 MAP response of controllers for different types of BP artifacts: ExpBPmax, ExpBPmin, LinearAtt, Square, HighFreq, and Sinc
